# Supplementary material for: Nitrogen-self-doped carbon with a porous graphene-like structure as a highly efficient catalyst for oxygen reduction
Source: Royal Society of Chemistry journal article supplement (doi:10.1039/c5ta00547g), 2015-01-01

## Supplementary Information:

### Nitrogen-Self-doped carbon with porous graphene-like structures as a highly efficient catalyst for oxygen reduction

Jian Zhang,<sup>a</sup> Qidong Li,<sup>b</sup> Hui Wu,<sup>a</sup> Chenyu Zhang,<sup>a</sup> Kun Cheng,<sup>a</sup> Huang Zhou,<sup>a</sup> Mu Pan<sup>a</sup> and Shichun Mu\*<sup>a</sup>

<sup>a</sup>State Key Laboratory of Advanced Technology for Materials Synthesis and Processing, Wuhan University of Technology, Wuhan 430070, China

Fax: +86 27 87879468. E-mail: [msc@whut.edu.cn](mailto:msc@whut.edu.cn).

<sup>b</sup>WUT-Harvard Joint Nano Key Laboratory, Wuhan University of Technology, Wuhan 430070, China.

#### Contents

**Figure S1** FESEM images of the sample without Fe (PA-U).

**Figure S2** Crumpled and entangled graphene-like structure of Fe-PA-U at different magnifications of HRTEM images.

**Figure S3** Raman spectra of Fe-PA and Fe-PA-U catalysts.

**Figure S4** The full width at half maximum of C1s spectra of Fe-PA and Fe-PA-U.

**Figure S5** N1s fitted results of Fe-PA and Fe-PA-U.

**Table S1** The content of C, N, O, Fe and different types of N contents of Fe-PA and Fe-PA-U catalysts.

**Figure S6** The electrochemical impedance spectroscopy of Fe-PA and Fe-PA-U catalysts under open circuit potential at frequency ranges of 100 kHz to 1 Hz.

**Figure S7** The equivalent circuit.

**Table S2** Comparison of ORR activity of the literature reports.

The Koutecky-Levich (K-L) equation.

**Figure S8** ORR polarization curves for Fe-PA (a) and Fe-PA-U (b) at different rotating rates in O<sub>2</sub>-saturated 0.1 M KOH solution with scanning rates of 5 mV s<sup>-1</sup>, inset: K-L plots.

**Figure S9** LSV curves for PA-U, Fe-PA and Fe-PA-U catalysts.

**Figure S10** Comparative LSV curves for Fe-PA-U and the sample of Fe-PA-U was treated with aqua regia.

**Figure S1**

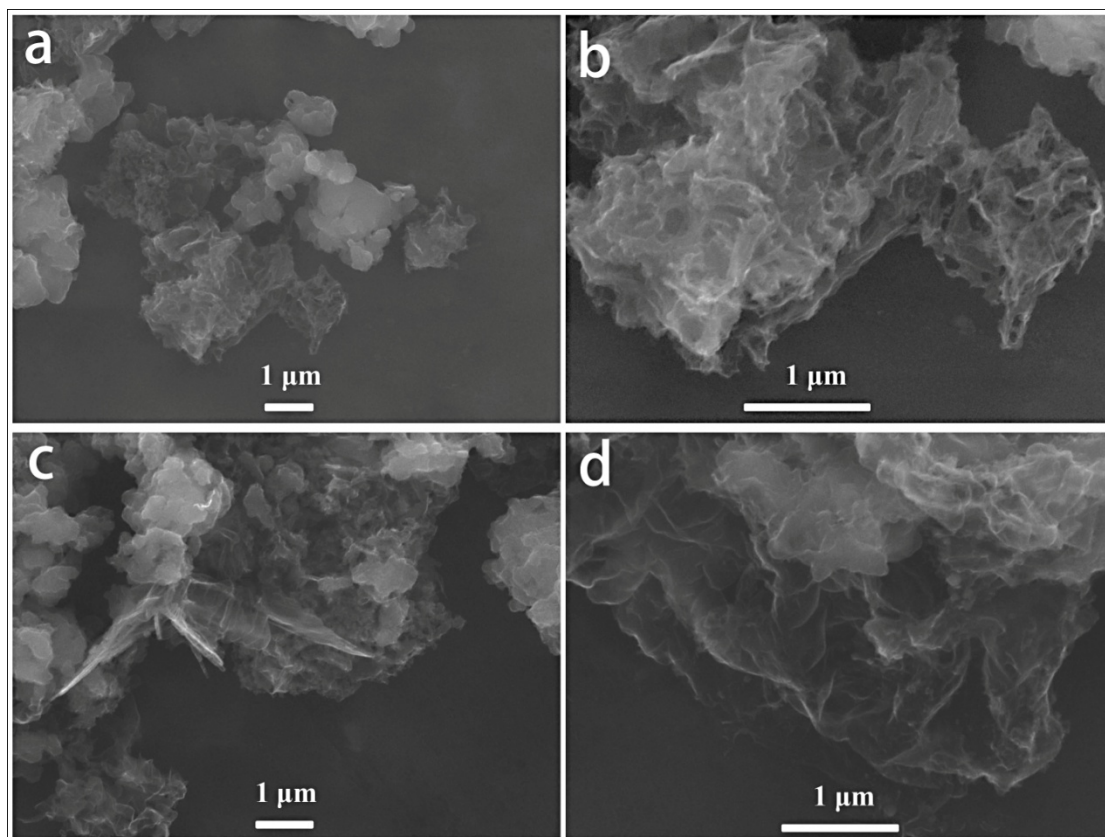

**Figure S2**

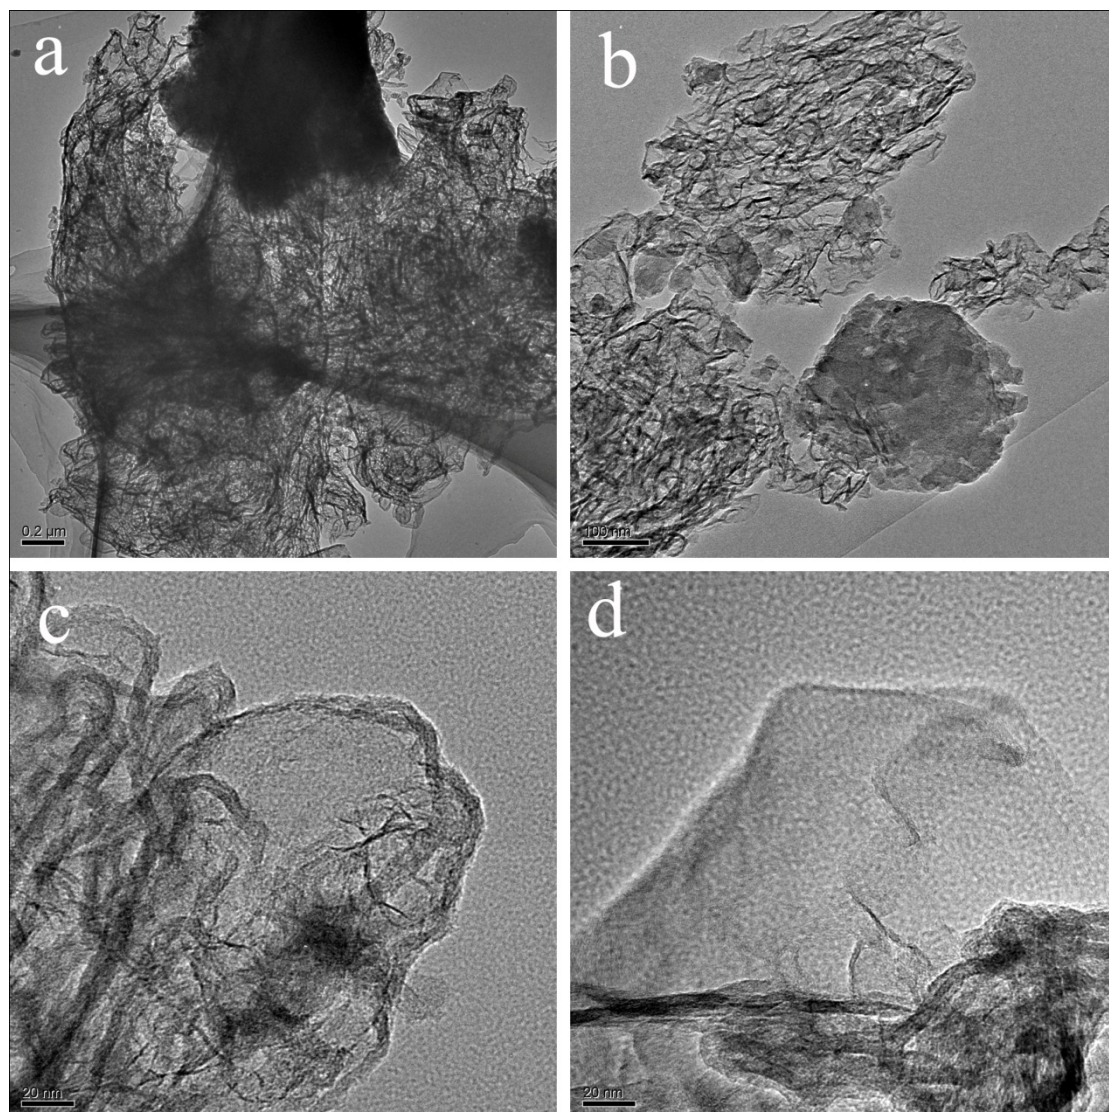

Figure S3

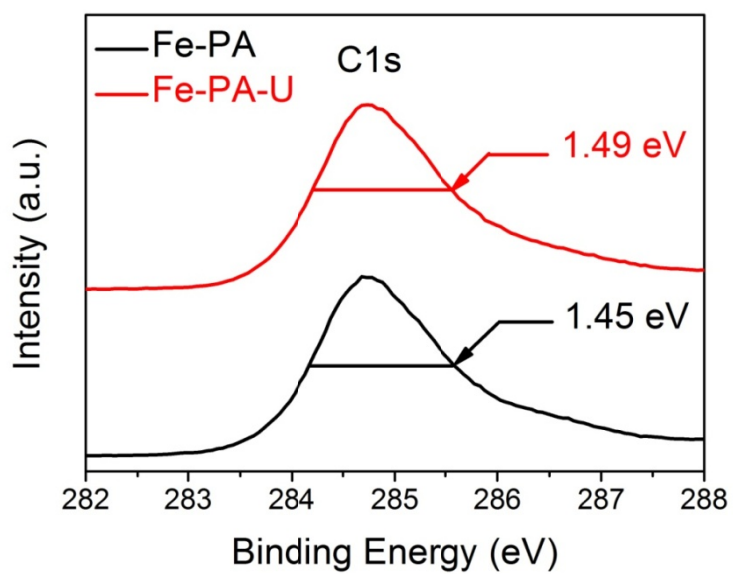

Figure S4

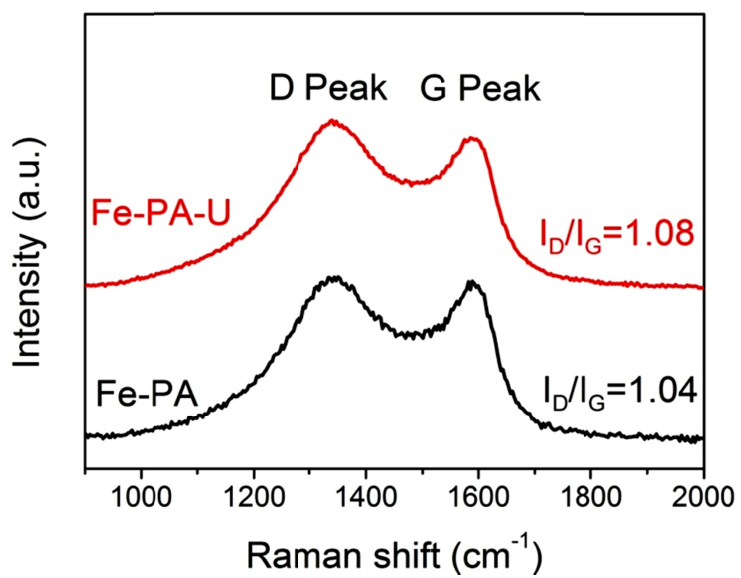

Figure S5

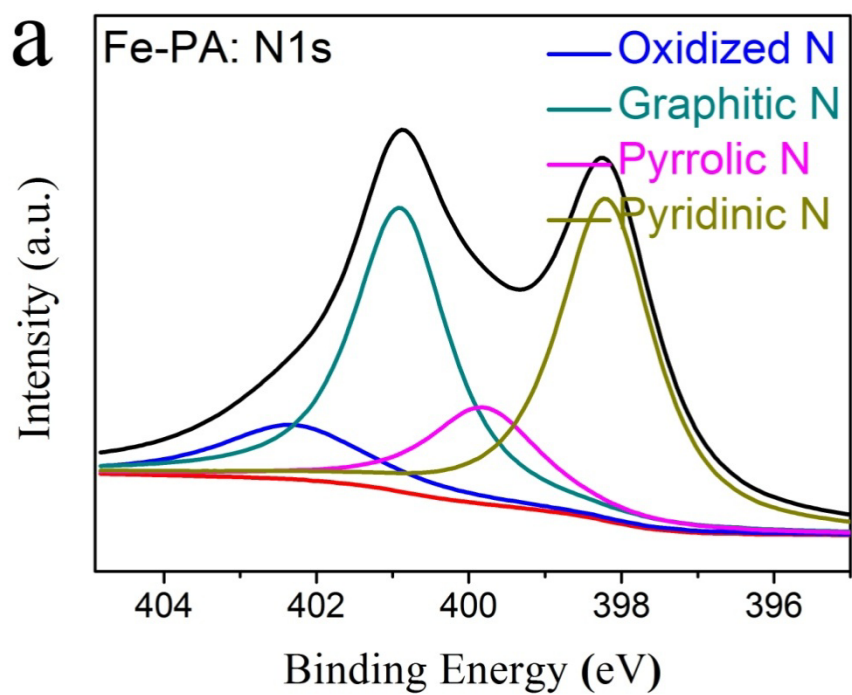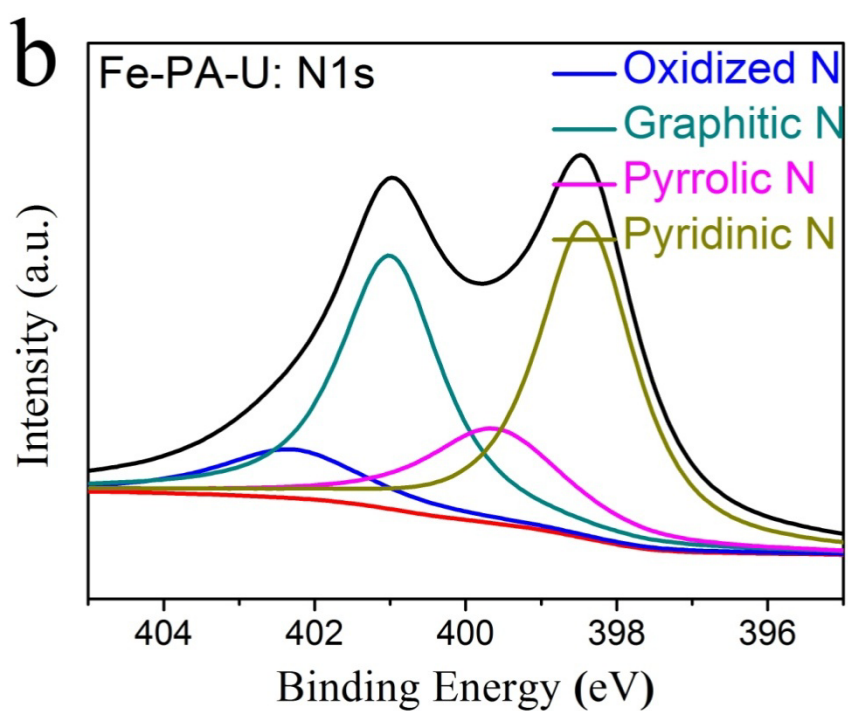

**Table S1**

| <b>Sample</b>   | <b>Content (%)</b> |      |      |      | <b>Content of N species (%)</b> |           |          |           |
|-----------------|--------------------|------|------|------|---------------------------------|-----------|----------|-----------|
|                 | C                  | N    | O    | Fe   | Oxidized                        | Graphitic | Pyrrolic | Pyridinic |
| <b>Fe-PVP</b>   | 83.06              | 3.08 | 13.6 | 0.26 | 0.320                           | 1.08      | 0.445    | 1.24      |
| <b>Fe-PVP-U</b> | 84.54              | 5.63 | 9.40 | 0.43 | 0.516                           | 1.87      | 0.983    | 2.26      |

Figure S6

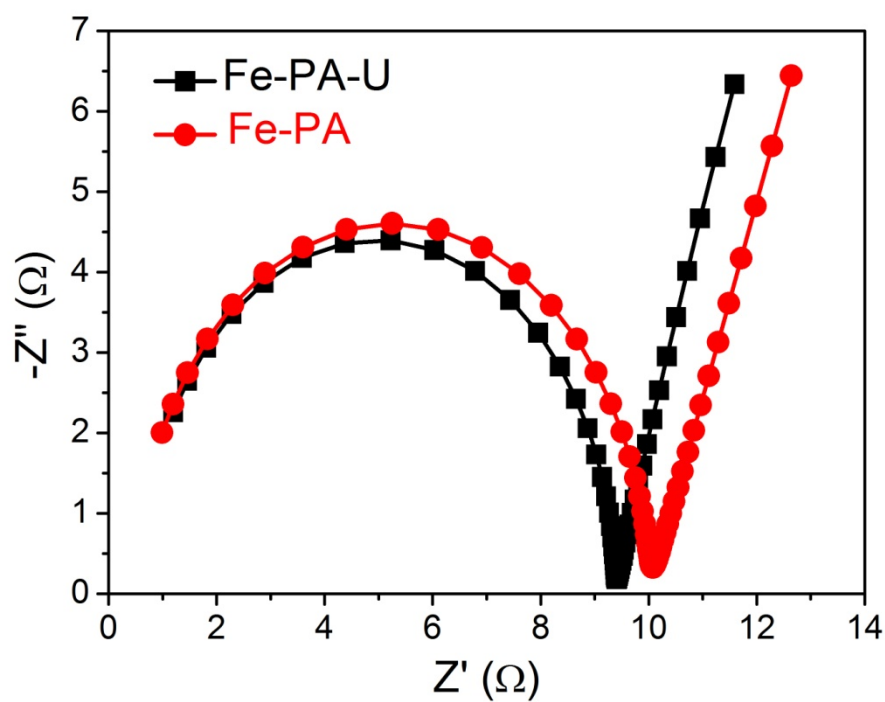

Figure S7

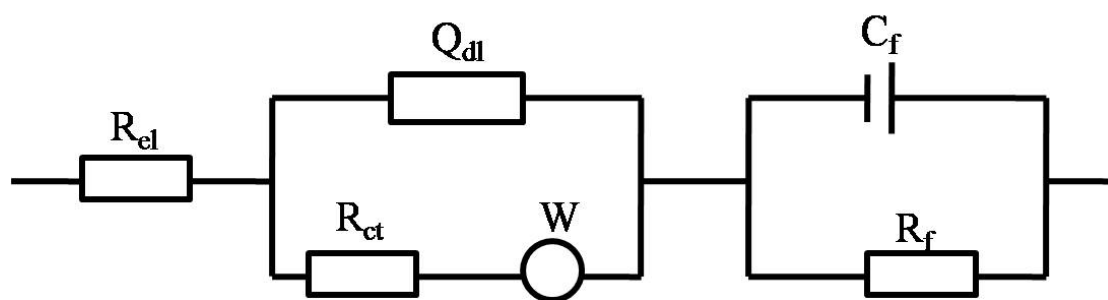

The equivalent circuit, where  $R_{el}$  is solution resistance,  $R_{ct}$  is charge transfer resistance,  $W$  is Warburg element,  $Q_{dl}$  is double layer capacitance,  $R_f$  is film resistance,  $C_f$  is film capacitance.



**Table S2**

| <b>Catalyst</b>                                              | <b>Template</b>        | <b>E<sub>onset</sub> (V) /</b><br><b>relative to</b><br><b>Pt/C</b> | <b>E<sub>1/2</sub> (V) /</b><br><b>relative to</b><br><b>Pt/C</b> | <b>Reference</b><br><b>electrode</b> | <b>Medium</b>            | <b>Ref.</b>  |
|--------------------------------------------------------------|------------------------|---------------------------------------------------------------------|-------------------------------------------------------------------|--------------------------------------|--------------------------|--------------|
| <b>Fe-PA-U</b>                                               | -                      | -0.08 V /<br>-50 mV                                                 | -0.24 V /<br>-100 mV                                              | SCE                                  | 0.1 M KOH<br>at 1600 rpm | this<br>work |
| <b>P-Z8-Te-1</b><br><b>000</b>                               | silica<br>colloid      | 0.93 V /<br>-20 mV                                                  | 0.85 V /<br>0 mV                                                  | RHE                                  | 0.1 M KOH<br>at 1600 rpm | 1            |
| <b>N-Fe-MO</b><br><b>F</b>                                   | MOF                    | 1.02 V /<br>0 mV                                                    | 0.88 V /<br>ca. +10 mV                                            | RHE                                  | 0.1 M KOH<br>at 1600 rpm | 2            |
| <b>N-doped</b><br><b>Fe/Fe<sub>3</sub>C@</b><br><b>C/RGO</b> | MOF                    | 0.99 V /<br>ca. 0 mV                                                | 0.92 V /<br>ca. -10 mV                                            | RHE                                  | 0.1 M KOH<br>at 1600 rpm | 3            |
| <b>Carbon-S</b>                                              | ZIF-7                  | 0.844 V /<br>-80 mV                                                 | 0.678 V /<br>ca. -110 mV                                          | RHE                                  | 0.1 M KOH<br>at 1600 rpm | 4            |
| <b>SN/C-900</b>                                              | Nano silica<br>spheres | 0.03 V /<br>-10 mV                                                  | -0.25 V /<br>ca. -50 mV                                           | Ag/AgCl                              | 0.1 M KOH<br>at 1600 rpm | 5            |
| <b>NPS-C-M</b>                                               | MOF                    | -0.006 V /                                                          | -0.24 V /                                                         | Ag/AgCl                              | 0.1 M KOH                | 6            |

|                   |        |            |            |         |             |    |
|-------------------|--------|------------|------------|---------|-------------|----|
| OF-5              |        | -36 mV     | ca. -50 mV |         | at 1600 rpm |    |
| <b>NC900</b>      | ZIF-8  | 0.83 V /   | -          | RHE     | 0.1 M KOH   | 7  |
|                   |        | ca. -100   |            |         | at 1600 rpm |    |
|                   |        | mV         |            |         |             |    |
| <b>PANI-4.5</b>   | SBA-15 | 0.95 V /   | 0.84 V /   | RHE     | 0.1 M KOH   | 8  |
| <b>Fe-HT2(S</b>   |        | -40 mV     | +10 mV     |         | at 1600 rpm |    |
| <b>BA-15)</b>     |        |            |            |         |             |    |
| <b>N-PANn-1</b>   | AAO    | -0.05 V /  | -/         | Ag/AgCl | 0.1 M KOH   | 9  |
| <b>000</b>        |        | -20 mV     | -          |         | at 1600 rpm |    |
| <b>NS(3 : 1)-</b> | MOF    | -0.005 V / | -/-        | Ag/AgCl | 0.1 M KOH   | 10 |
| <b>C-MOF-5</b>    |        | -5 mV      |            |         | at 1600 rpm |    |
| <b>ZIF-67-90</b>  | ZIF-67 | 0.94V /    | -/-        | RHE     | 0.1 M KOH   | 11 |
| <b>0-AL</b>       |        | -40 mV     |            |         | at 1600 rpm |    |

$E_0$ : onset potential,  $E_{1/2}$ : half-wave potential, MOF: metal–organic framework, ZIF: zeolitic imidazolate frameworks, SBA: ordered mesoporous silica, AAO: Anodic alumina oxide.

1. H. W. Liang, X. Zhuang, S. Bruller, X. Feng and K. Mullen, Nature communications, 2014, 5, 4973.

2. Q. Li, P. Xu, W. Gao, S. Ma, G. Zhang, R. Cao, J. Cho, H. L. Wang and G. Wu, *Advanced materials*, 2014, 26, 1378-1386.
3. Y. Hou, T. Huang, Z. Wen, S. Mao, S. Cui and J. Chen, *Advanced Energy Materials*, 2014, 4, 140037.
4. P. Zhang, F. Sun, Z. Xiang, Z. Shen, J. Yun and D. Cao, *Energy & Environmental Science*, 2014 MOF, 7, 442-450.
5. Y. Li, H. Zhang, Y. Wang, P. Liu, H. Yang, X. Yao, D. Wang, Z. Tang and H. Zhao, *Energy & Environmental Science*, 2014.
6. J. S. Li, S. L. Li, Y. J. Tang, K. Li, L. Zhou, N. Kong, Y. Q. Lan, J. C. Bao and Z. H. Dai, *Scientific reports*, 2014, 4, 5130.
7. A. Aijaz, N. Fujiwara and Q. Xu, *Journal of the American Chemical Society*, 2014, 136, 6790-6793.
8. X.-H. Yan and B. Q. Xu, *Journal of Materials Chemistry A*, 2014, 2, 8617-8622.
9. X. She, D. Yang, D. Jing, F. Yuan, W. Yang, L. Guo and Y. Che, *Nanoscale*, 2014, 6, 11057-11061.
10. J. Li, Y. Chen, Y. Tang, S. Li, H. Dong, K. Li, M. Han, Y.-Q. Lan, J. Bao and Z. Dai, *Journal of Materials Chemistry A*, 2014, 2, 6316-6319.
11. X. Wang, J. Zhou, H. Fu, W. Li, X. Fan, G. Xin, J. Zheng and X. Li, *Journal of Materials Chemistry A*, 2014, 2, 14064.

## The Koutecky-Levich (K-L) equation

The K–L equation as given below:

$$\frac{1}{J} = \frac{1}{J_L} + \frac{1}{J_K} = \frac{1}{B\omega^{1/2}} + \frac{1}{J_K} \quad (1)$$

$$B = 0.62nFC_0(D_0)^{2/3}\nu^{-1/6} \quad (2)$$

where J denotes the measured current density,  $J_K$  is the kinetic current density,  $J_L$  is the diffusion-limited current density,  $\omega$  is the electrode rotation rate, F is the Faraday constant (96485 C mol<sup>-1</sup>),  $C_0$  is the bulk concentration of O<sub>2</sub> (1.2×10<sup>-3</sup> mol L<sup>-1</sup>),  $D_0$  is the diffusion coefficient of O<sub>2</sub> (1.9 ×10<sup>-5</sup> cm<sup>2</sup> s<sup>-1</sup>) and  $\nu$  is the kinetic viscosity of the electrolyte (1.0×10<sup>-2</sup> cm<sup>2</sup> s<sup>-1</sup>).

Figure S8

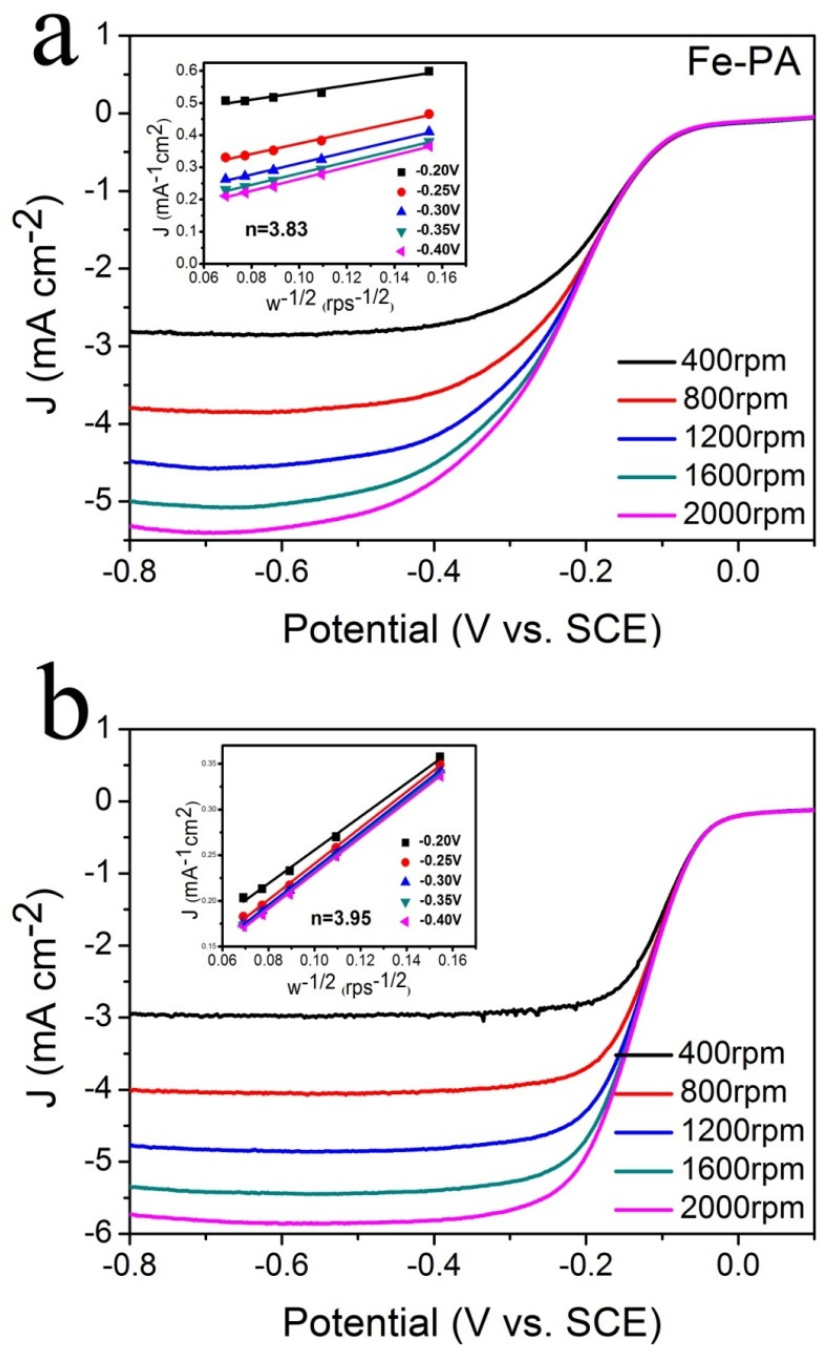

Figure S9

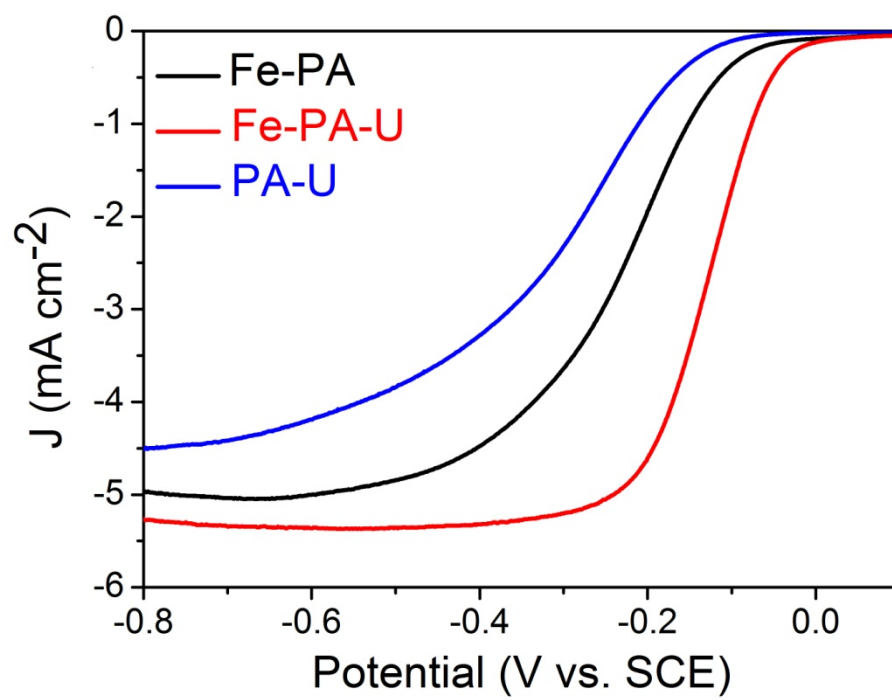

Figure S10

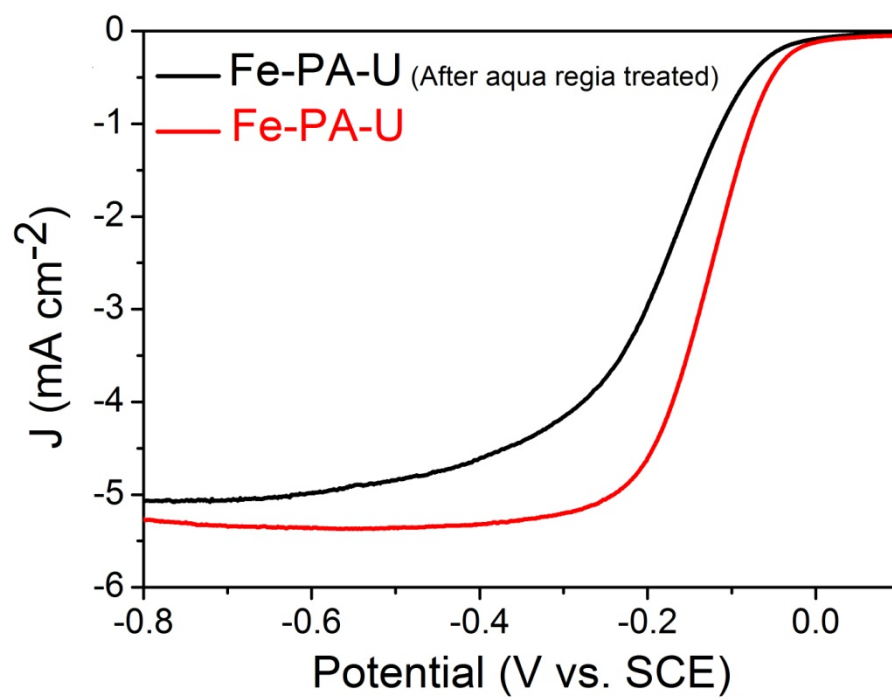

Supplement: c5ta00547g1.pdf [file c5ta00547g1.pdf]
